# Supplementary material
Source: PubMed Central journal article supplement (PMC11103166)
Supplement: mmc2.pdf [file mmc2.pdf]

Pressure-mediated reflection spectroscopy criterion validity as a biomarker of fruit and vegetable intake: A two-site cross-sectional study of four racial/ethnic groups

Stephanie Jilcott Pitts, PhD (First and corresponding author)

Online Supplementary Material

Supplemental Table 1. Pearson correlations between skin carotenoids, melanin, semi-quantitative food frequency questionnaire (SFFQ) self-reported dietary carotenoids, and plasma carotenoids, overall and by racial/ethnic group.

| SFFQ Dietary Variables                        | All<br>N = 213   |                | Black<br>N = 61  |                | Asian<br>N = 53  |                | White<br>N = 70  |                | Hispanic<br>N = 29 |                |
|-----------------------------------------------|------------------|----------------|------------------|----------------|------------------|----------------|------------------|----------------|--------------------|----------------|
|                                               | Skin carotenoids | Melanin index  | Skin carotenoids   | Melanin index  |
| Fruits and vegetables, servings / day         | 0.365<br>0.376   | 0.289<br>0.285 | 0.291<br>0.283   | 0.119<br>0.133 | 0.446<br>0.406   | 0.352<br>0.288 | 0.539<br>0.532   | 0.450<br>0.419 | 0.466<br>0.530     | 0.438<br>0.460 |
| P-value                                       | <.001            | <.001          | 0.024 0.029      | 0.364 0.311    | 0.001 0.003      | 0.010 0.037    | <.001            | <.001          | 0.013 0.004        | 0.020 0.014    |
| Total carotenoids from foods                  | 0.396            | 0.271          | 0.428            | 0.049          | 0.522            | 0.513          | 0.306            | 0.212          | 0.530              | 0.446          |
| P-value                                       | <.001            | <.001          | 0.001            | 0.712          | <.001            | <.001          | 0.010            | 0.079          | 0.004              | 0.017          |
| Total carotenoids from foods without lycopene | 0.416            | 0.239          | 0.426            | 0.031          | 0.555            | 0.497          | 0.318            | 0.142          | 0.558              | 0.426          |
| P-value                                       | <.001            | 0.001          | 0.001            | 0.814          | <.001            | 0.000          | 0.007            | 0.242          | 0.002              | 0.024          |
| $\alpha$ -carotene from foods                 | 0.347            | 0.230          | 0.305            | 0.071          | 0.415            | 0.383          | 0.301            | 0.307          | 0.409              | 0.269          |
| P-value                                       | <.001            | 0.001          | 0.018            | 0.588          | 0.002            | 0.005          | 0.011            | 0.010          | 0.031              | 0.166          |
| $\beta$ -carotene from foods                  | 0.398            | 0.238          | 0.377            | 0.019          | 0.550            | 0.492          | 0.308            | 0.185          | 0.566              | 0.420          |
| P-value                                       | <.001            | 0.001          | 0.003            | 0.883          | <.001            | 0.000          | 0.010            | 0.126          | 0.002              | 0.026          |
| $\beta$ -cryptoxanthin from foods             | 0.202            | 0.141          | 0.220            | 0.066          | 0.040            | 0.031          | 0.394            | 0.291          | 0.451              | 0.346          |
| P-value                                       | 0.003            | 0.041          | 0.091            | 0.618          | 0.777            | 0.827          | 0.001            | 0.015          | 0.016              | 0.071          |

|                                    |       |        |       |       |       |       |       |       |        |       |
|------------------------------------|-------|--------|-------|-------|-------|-------|-------|-------|--------|-------|
| Lycopene from foods                | 0.081 | 0.197  | 0.142 | 0.080 | 0.236 | 0.367 | 0.102 | 0.251 | -0.115 | 0.097 |
| P-value                            | 0.241 | 0.004  | 0.278 | 0.544 | 0.089 | 0.007 | 0.403 | 0.036 | 0.561  | 0.622 |
| Lutein from foods                  | 0.391 | 0.200  | 0.471 | 0.030 | 0.522 | 0.466 | 0.265 | 0.029 | 0.547  | 0.459 |
| P-value                            | <.001 | 0.004  | 0.000 | 0.817 | <.001 | 0.000 | 0.027 | 0.812 | 0.003  | 0.014 |
| Plasma carotenoid variables        |       |        |       |       |       |       |       |       |        |       |
| Total carotenoids                  | 0.713 | 0.511  | 0.634 | 0.368 | 0.695 | 0.672 | 0.727 | 0.555 | 0.785  | 0.555 |
| P-value                            | <.001 | <.001  | <.001 | 0.004 | <.001 | <.001 | <.001 | <.001 | <.001  | 0.002 |
| $\alpha$ and $\beta$ cryptoxanthin | 0.623 | 0.354  | 0.624 | 0.313 | 0.577 | 0.398 | 0.648 | 0.429 | 0.635  | 0.433 |
| P-value                            | <.001 | <.001  | <.001 | 0.014 | <.001 | 0.003 | <.001 | <.001 | <.001  | 0.019 |
| Lutein + zeaxanthin                | 0.658 | 0.313  | 0.509 | 0.072 | 0.704 | 0.431 | 0.646 | 0.439 | 0.744  | 0.327 |
| P-value                            | <.001 | <.001  | <.001 | 0.583 | <.001 | 0.001 | <.001 | <.001 | <.001  | 0.083 |
| $\alpha$ -carotene                 | 0.595 | 0.454  | 0.654 | 0.308 | 0.529 | 0.640 | 0.628 | 0.494 | 0.634  | 0.565 |
| P-value                            | <.001 | <.0001 | <.001 | 0.016 | <.001 | <.001 | <.001 | <.001 | 0.000  | 0.001 |
| Total $\beta$ -Carotene            | 0.662 | 0.470  | 0.646 | 0.271 | 0.651 | 0.723 | 0.656 | 0.496 | 0.749  | 0.488 |
| P-value                            | <.001 | <.001  | <.001 | 0.035 | <.001 | <.001 | <.001 | <.001 | <.001  | 0.007 |
| Total Lycopene                     | 0.066 | 0.226  | 0.085 | 0.336 | 0.114 | 0.160 | 0.010 | 0.117 | 0.248  | 0.395 |
| P-value                            | 0.335 | 0.001  | 0.516 | 0.008 | 0.418 | 0.251 | 0.937 | 0.336 | 0.194  | 0.034 |
| Melanin index                      | 0.499 |        | 0.231 |       | 0.677 |       | 0.612 |       | 0.535  |       |
| P-value                            | <.001 |        | 0.073 |       | <.001 |       | <.001 |       | 0.003  |       |

Supplemental Table 2. Pearson correlations between log<sub>2</sub>-transformed plasma carotenoids, log<sub>2</sub>-transformed F&V consumption, and log<sub>2</sub>-transformed dietary carotenoid intake within each racial/ethnic group.

|                                        | Self-reported FV intake                          | Self-reported carotenoid intake |
|----------------------------------------|--------------------------------------------------|---------------------------------|
| Total plasma carotenoids               | Correlations                                     | Correlations                    |
| Total                                  | <del>0.317</del> 0.307<br><.001                  | 0.366<br><.001                  |
| Non-Hispanic Black or African American | <del>0.160</del> 0.137<br><del>0.223</del> 0.296 | 0.291<br>0.024                  |
| Asian                                  | <del>0.356</del> 0.321<br><del>0.009</del> 0.019 | 0.438<br>0.001                  |
| Non-Hispanic White                     | <del>0.477</del> 0.504<br><.001                  | 0.344<br>0.004                  |
| Hispanic/ Latino                       | <del>0.389</del> 0.395<br><del>0.041</del> 0.038 | 0.477<br>0.010                  |

Note: A log<sub>2</sub>-transformation was used to stabilize variances and improve the linearity of the relationships.
